# Supplementary material for: Nutritional Status According to the GLIM Criteria in Patients with Chronic Heart Failure: Association with Prognosis
Source: MDPI journal article supplement (doi:10.3390/nu14112244), 2022-05-27
Supplement: s1 [file s1]

Supplementary Materials

# Nutritional Status According to the GLIM Criteria in Patients with Chronic Heart Failure: Association with Prognosis

Clara Joaquín <sup>1,2,†,\*</sup>, Nuria Alonso <sup>1,2,†</sup>, Josep Lupón <sup>2,3,4,5</sup>, Paloma Gastelurrutia <sup>3,4</sup>, Alejandra Pérez-Monstesdeoca <sup>1</sup>, Mar Domingo <sup>5</sup>, Elisabet Zamora <sup>2,4,5</sup>, Guillem Socías <sup>1</sup>, Analía Ramos <sup>12</sup>, Antoni Bayes-Genis <sup>2,3,4,5,†</sup> and Manel Puig-Domingo <sup>1,2,†</sup>

**Table S1.** Competing risk strategy by Gray method results for factors potentially related to the 5-year CV mortality, considering non-cardiovascular mortality as the competing event for cardiovascular death.

| Factor                     | 5-year CV mortality          |                 |                               |                 |                              |                 |
|----------------------------|------------------------------|-----------------|-------------------------------|-----------------|------------------------------|-----------------|
|                            | Univariate                   |                 | Multivariate GLIM             |                 | Multivariate MNA             |                 |
|                            | HR<br>(95% CI)               | <i>p</i> -value | HR<br>(95% CI)                | <i>p</i> -value | HR<br>(95% CI)               | <i>p</i> -value |
| Age                        | <b>1.15</b><br>(1.11–1.19)   | < 0.001         | <b>1.11</b><br>(1.07–1.15)    | < 0.001         | <b>1.13</b><br>(1.09–1.18)   | < 0.001         |
| Sex                        | <b>6.35</b><br>(3.08–13.07)  | < 0.001         | ---                           | ---             | ---                          | ---             |
| BMI                        | <b>1.11</b><br>(1.03–1.20)   | 0.004           | ---                           | ---             | <b>1.09</b><br>(1.01–1.17)   | 0.015           |
| NYHA class                 | <b>96.17</b><br>(43.6–211.7) | < 0.001         | <b>34.19</b><br>(13.25–88.21) | < 0.001         | <b>22.90</b><br>(9.36–56.01) | < 0.001         |
| MNA <sup>a</sup>           | <b>14.82</b><br>(6.63–33.12) | < 0.001         | NE                            | NE              | <b>10.19</b><br>4.54–22.88   | < 0.001         |
| GLIM criteria <sup>a</sup> | 2.16<br>(0.97–4.83)          | 0.06            | ---                           | ---             | NE                           | NE              |
| Barthel index              | <b>0.93</b><br>(0.91–0.95)   | < 0.001         | ---                           | ---             | ---                          | ---             |
| Diabetes Mellitus          | <b>6.31</b><br>(3.22–12.37)  | < 0.001         | <b>2.30</b><br>(1.15–4.61)    | 0.018           | <b>2.12</b><br>(1.09–4.14)   | 0.027           |

Bold values indicate factors significantly related to mortality. <sup>a</sup> For analyses MNA and GLIM criteria categories were merged in normal nutritional status and abnormal nutritional status. BMI = Body Mass Index. NYHA = New York Heart Association; MNA = Mini Nutritional Assessment; MN = Malnutrition; P-values were based on Cox regression analysis. NE = Non-evaluated.

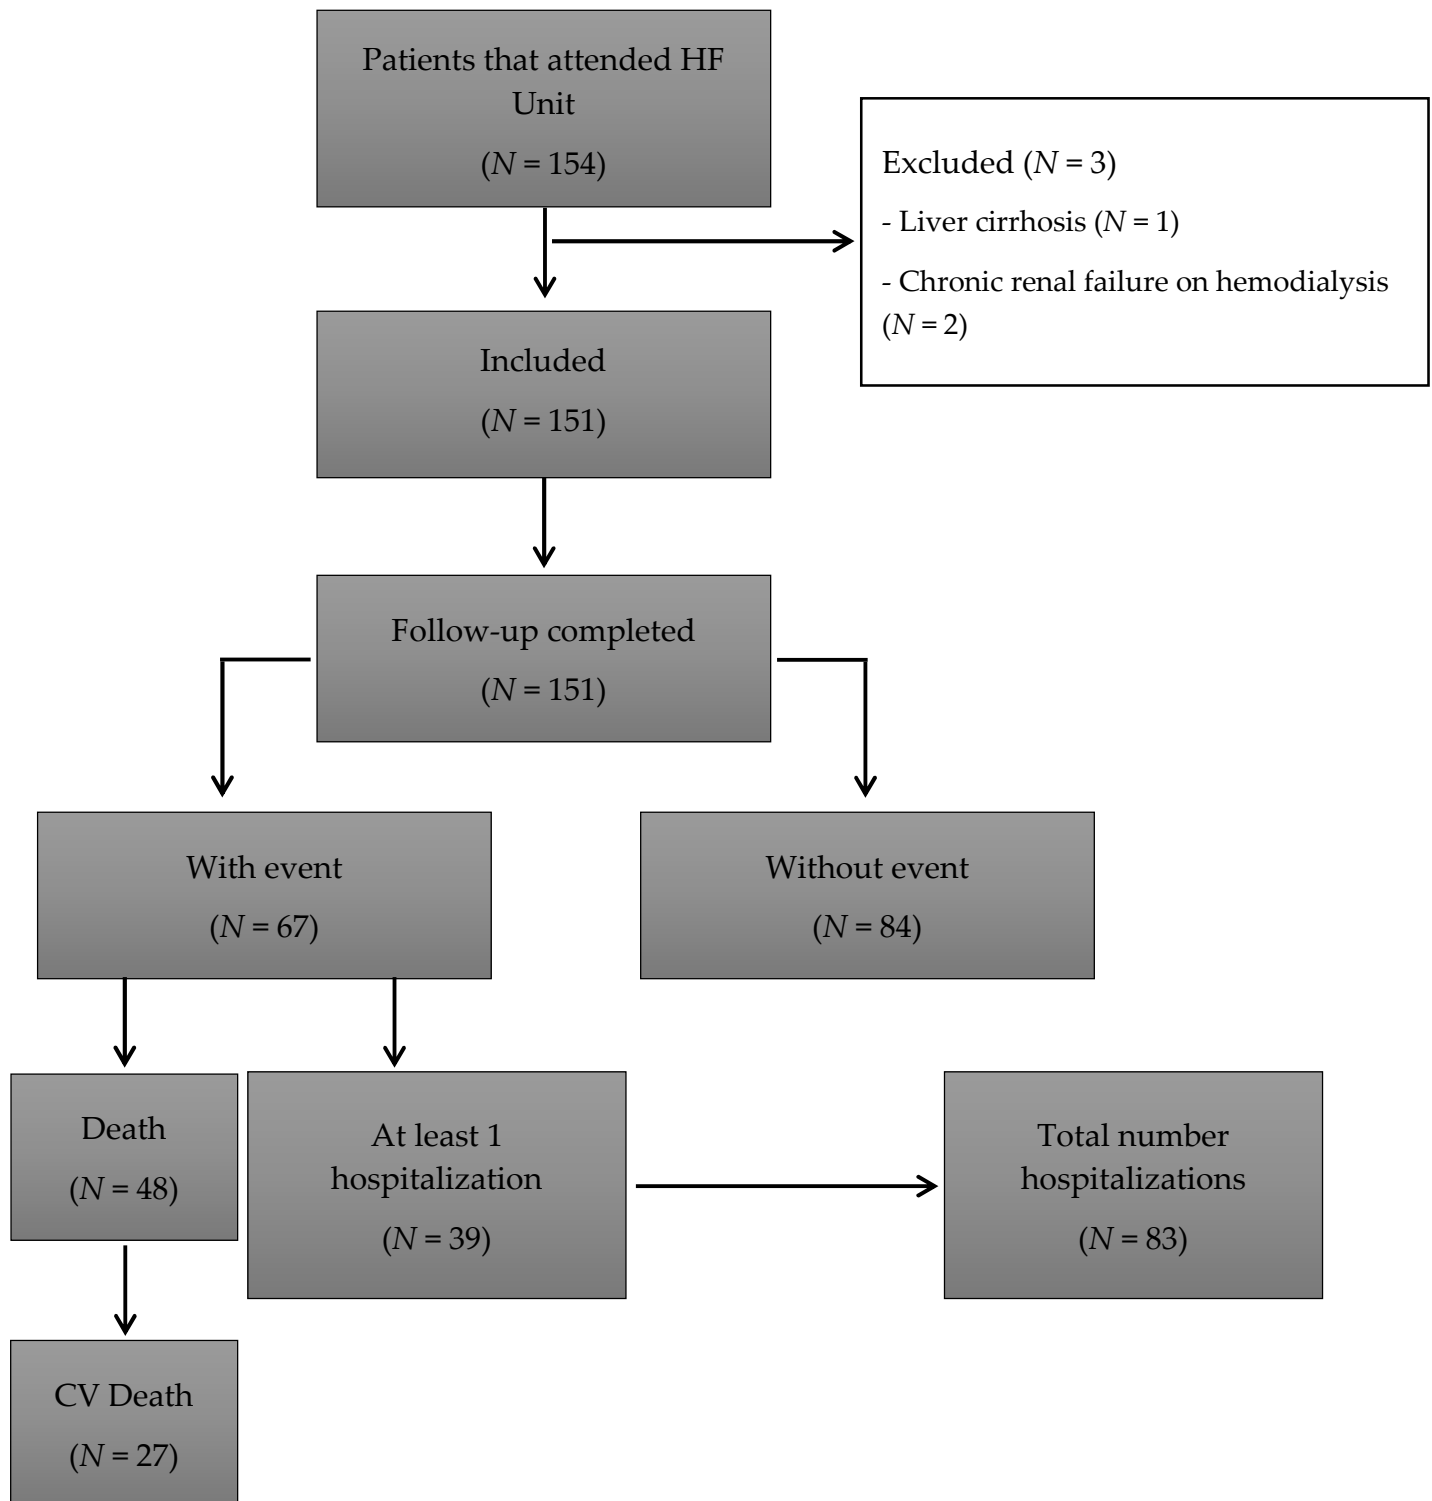

**Figure S1.** Study flowchart.
